# Supplementary material
Source: PubMed Central journal article supplement (PMC4761272)
Supplement: NIHMS723956-supplement-13415_2015_379_MOESM1_ESM.pdf [file NIHMS723956-supplement-13415_2015_379_MOESM1_ESM.pdf]

**Supplemental Table 1A. Gender Differences in Thresholds (Video Subjects, N = 22)**

| <b>Source</b>            | <b>Num df</b> | <b>Den df</b> | <b>F-value</b> | <b>p-value</b>   |
|--------------------------|---------------|---------------|----------------|------------------|
| <b>Gender</b>            | 1             | 20            | 0.15           | 0.70             |
| <b>Category</b>          | 3             | 60            | 7.72           | <b>&lt;0.001</b> |
| <b>Gender X Category</b> | 3             | 60            | 0.85           | 0.47             |

**Supplemental Table 1B. Gender Differences in Ratings (Video Subjects, N = 22)**

| <b>Source</b>            | <b>Num df</b> | <b>Den df</b>   | <b>F-value</b> | <b>p-value</b>   |
|--------------------------|---------------|-----------------|----------------|------------------|
| <b>Gender</b>            | 1             | 20              | 12.40          | <b>0.002</b>     |
| <b>Category</b>          | 3             | 58 <sup>a</sup> | 12.37          | <b>&lt;0.001</b> |
| <b>Gender X Category</b> | 3             | 58 <sup>a</sup> | 2.14           | 0.10             |

<sup>a</sup>Two subjects did not have ratings for the bike accidents category, as they skipped every trial, hence the reduced degrees of freedom.
