# Supplementary material
Source: PubMed Central journal article supplement (PMC4761272)
Supplement: NIHMS723956-supplement-13415_2015_379_MOESM2_ESM.pdf [file NIHMS723956-supplement-13415_2015_379_MOESM2_ESM.pdf]

**Supplemental Table 2A. Gender Differences in Thresholds (Photo Subjects, N = 15)**

| <b>Source</b>            | <b>Num df</b> | <b>Den df</b> | <b>F-value</b> | <b><i>p</i>-value</b> |
|--------------------------|---------------|---------------|----------------|-----------------------|
| <b>Gender</b>            | 1             | 13            | 0.54           | 0.47                  |
| <b>Category</b>          | 3             | 39            | 1.47           | 0.24                  |
| <b>Gender X Category</b> | 3             | 39            | 0.73           | 0.54                  |

**Supplemental Table 2B. Gender Differences in Ratings (Photo Subjects, N = 15)**

| <b>Source</b>            | <b>Num df</b> | <b>Den df</b> | <b>F-value</b> | <b><i>p</i>-value</b> |
|--------------------------|---------------|---------------|----------------|-----------------------|
| <b>Gender</b>            | 1             | 13            | 0.18           | 0.68                  |
| <b>Category</b>          | 3             | 39            | 3.15           | <b>0.04</b>           |
| <b>Gender X Category</b> | 3             | 39            | 0.21           | 0.89                  |
