# Supplementary material
Source: PubMed Central journal article supplement (PMC4761272)
Supplement: NIHMS723956-supplement-13415_2015_379_MOESM3_ESM.pdf [file NIHMS723956-supplement-13415_2015_379_MOESM3_ESM.pdf]

**Supplemental Table 3A. Gender Differences in Thresholds (Video Subjects, N = 49)**

| <b>Source</b>            | <b>Num df</b> | <b>Den df</b> | <b>F-value</b> | <b>p-value</b>   |
|--------------------------|---------------|---------------|----------------|------------------|
| <b>Gender</b>            | 1             | 47            | 4.37           | <b>0.04</b>      |
| <b>Category</b>          | 3             | 141           | 12.21          | <b>&lt;0.001</b> |
| <b>Gender X Category</b> | 3             | 141           | 2.77           | <b>0.04</b>      |

**Supplemental Table 3B. Gender Differences in Ratings (Video Subjects, N = 49)**

| <b>Source</b>            | <b>Num df</b> | <b>Den df</b>    | <b>F-value</b> | <b>p-value</b>   |
|--------------------------|---------------|------------------|----------------|------------------|
| <b>Gender</b>            | 1             | 47               | 1.06           | 0.31             |
| <b>Category</b>          | 3             | 138 <sup>a</sup> | 28.81          | <b>&lt;0.001</b> |
| <b>Gender X Category</b> | 3             | 138 <sup>a</sup> | 6.12           | <b>&lt;0.001</b> |

<sup>a</sup>Three subjects did not have ratings for the bike accidents category, as they skipped every trial, hence the reduced degrees of freedom.
